# Supplementary material for: A genome-wide cell-free DNA methylation analysis identifies an episignature associated with metastatic luminal B breast cancer
Source: PubMed Central journal article supplement (PMC9641197; doi:10.3389/fcell.2022.1016955), 2022-10-25
Supplement: DataSheet1.pdf [file DataSheet1.pdf]

## *Supplementary Material*

### 1 Supplementary Figures and Tables

#### 1.1 Supplementary Tables

**Supplementary Table 1.** List of primers used for the methylation analysis of *WNT1* by ddPCR.

| <b>Assay</b>   | <b>Primers/Probe</b> | <b>5'-Sequence-3'</b> |
|----------------|----------------------|-----------------------|
| <i>WNT1</i> -M | Forward              | GAGGGGTAGTTTTTTTT     |
|                | Reverse              | TCTAACTTTAACAACCCTAAA |
|                | Probe (FAM)          | GATCGCGAGTTATGTTGT    |
| <i>WNT1</i> -U | Forward              | GAGGGGTAGTTTTTTTT     |
|                | Reverse              | TCTAACTTTAACAACCCTAAA |
|                | Probe (HEX)          | GGATTGTGAGTTATGTTGTT  |

**Supplementary Table 2.** Clinical characteristics of metastatic patients with luminal B breast cancer included in the study.

| Characteristics             | Patients (n=9) |     |
|-----------------------------|----------------|-----|
|                             | No.            | %   |
| <b>Age (years)</b>          |                |     |
| <65                         | 3              | 33  |
| 65-75                       | 3              | 33  |
| >75                         | 3              | 33  |
| <b>Immunohistochemistry</b> |                |     |
| PR+                         | 8              | 89  |
| ER+                         | 9              | 100 |
| HER2+                       | 2              | 22  |
| Ki-67 $\geq$ 20%            | 9              | 100 |
| <b>Histology</b>            |                |     |
| Ductal                      | 9              | 100 |
| <b>Stage</b>                |                |     |
| IV                          | 9              | 100 |
| <b>Metastatic sites</b>     |                |     |
| 1                           | 4              | 44  |
| 2                           | 2              | 22  |
| 3                           | 3              | 33  |
| <b>Metastatic location</b>  |                |     |
| Visceral                    | 6              | 66  |
| Bone                        | 4              | 44  |



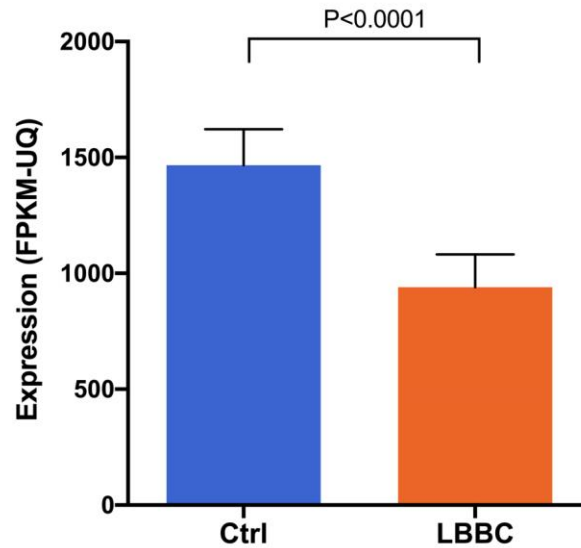

**Supplementary Figure 2.** Expression of *WNT1* in primary luminal B breast tumors. Gene expression levels of *WNT1* available in primary tumors of luminal B breast cancer patients (n=122) and nontumor controls (n=67) obtained by RNA-seq from TCGA. Expression levels are represented as the mean  $\pm$  SEM.

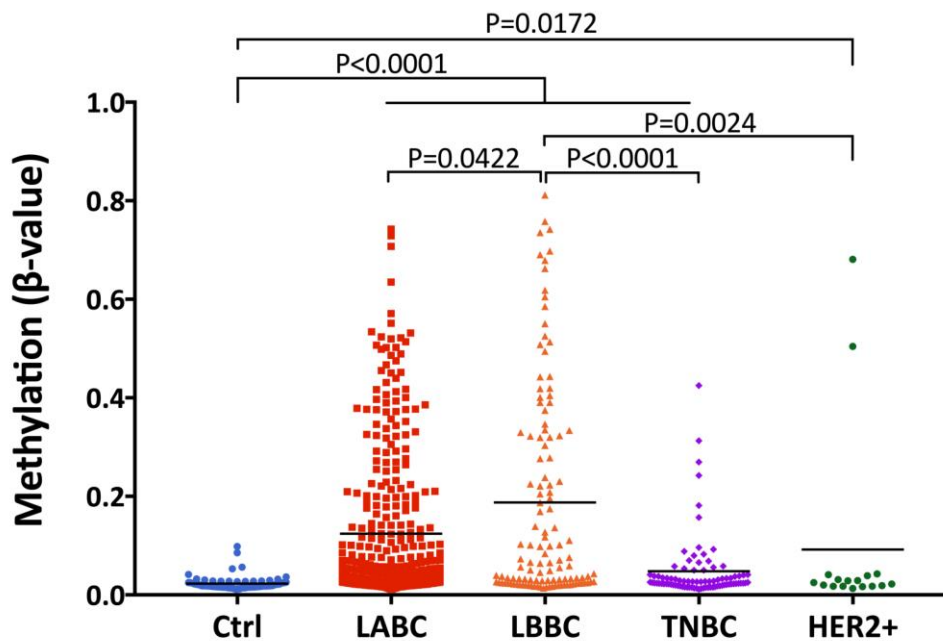

**Supplementary Figure 3.** Methylation status of *WNT1* in primary tumors of breast cancer subtypes (LABC, n=358; LBBC, n=122; TNBC, n=87; HER2+, n=17) and nontumor controls (n=79) from TCGA. Methylation data have been obtained from EPIC array analysis considering all TNM stages together (stages I-IV). Ctrl, control; P, p-value. LABC, luminal A breast cancer; LBBC, Luminal B breast cancer; TNBC, triple negative breast cancer; HER2+, HER2-positive.
